# Supplementary material for: Enhanced Bone Formation in Segmental Defect Healing Using 3D Printed Scaffolds Containing Bone Marrow Stromal Cells and Small Molecules Targeting Chondrogenesis and Osteogenesis
Source: MDPI journal article supplement (doi:10.3390/biomedicines14010227), 2026-01-20
Supplement: s1 [file biomedicines-3983482-supplementary.pdf › biomedicines-3983482-supplementary.pdf]

Table S1. Primer sequences for gene expression.

| Gene             | Gene Name                               | Accession      | Direction | Sequence                        |
|------------------|-----------------------------------------|----------------|-----------|---------------------------------|
| <i>Ki67</i>      | Ki67 antigen marker of proliferation    | NM_001081117.2 | Forward   | 5'-TGATGTTAGGTGTTTGAGGTCC-3'    |
|                  |                                         |                | Reverse   | 5'-CACTTTTCTGGTAACTTCTTGTC-3'   |
| <i>Ccnd1</i>     | Cyclin D1 (v1)                          | NM_001379248.1 | Forward   | 5'-AATGTACTCTGCTTTGCTGAA-3'     |
|                  |                                         |                | Reverse   | 5'-AATGTACTCTGCTTTGCTGAA-3'     |
| <i>Gdp1</i>      | Glycerol-3-Phosphate Dehydrogenase 1    | NM_010271.3    | Forward   | 5'-AAGTCAAGGGCTGCCGTT-3'        |
|                  |                                         |                | Reverse   | 5'-TCCCTTGGCAGCCTTTGC-3'        |
| <i>Ldha1</i>     | Lactate Dehydrogenase A Isoform 1 (v1)  | NM_010699.2    | Forward   | 5'-ACGCAGACAAGGAGCAGTGGAA-3'    |
|                  |                                         |                | Reverse   | 5'-ATGCTCTCAGCCAAGTCTGCCA-3'    |
| <i>Col2</i>      | Collagen 2 $\alpha$ 1 (v2)              | NM_001113515.3 | Forward   | 5'-TGGCTTCCACTTCAGCTATG-3'      |
|                  |                                         |                | Reverse   | 5'-AGGTAGGCGATGCTGTTCTT-3'      |
| <i>Acan</i>      | Aggrecan                                | L07049.1       | Forward   | 5'-GACCAGGAAGGGAGGAGTAG-3'      |
|                  |                                         |                | Reverse   | 5'-CAGCCGAGAAATGACACC-3'        |
| <i>Col10</i>     | Collagen 10 $\alpha$ 1                  | NM_009925.4    | Forward   | 5'-ACGGCACGCCTACGATGT-3'        |
|                  |                                         |                | Reverse   | 5'-CCATGATTGCACTCCCTG-3'        |
| <i>Mmp13</i>     | Matrix Metalloproteinase 13             | NM_008607.2    | Forward   | 5'-CATCCATCCCGTGACCTTAT-3'      |
|                  |                                         |                | Reverse   | 5'-TCATAACCATTTCAGAGCCCA-3'     |
| <i>Sox6</i>      | SRY-Box Transcription Factor 6          | BC067407.1     | Forward   | 5'-CGGAGGAAGTCGGTGAAGA-3'       |
|                  |                                         |                | Reverse   | 5'-GTCGGTTTTGGGAGTGGTG-3'       |
| <i>Sox9</i>      | SRY-Box Transcription Factor 9          | NM_011448.4    | Forward   | 5'-CGGAGGAAGTCGGTGAAGA-3'       |
|                  |                                         |                | Reverse   | 5'-GTCGGTTTTGGGAGTGGTG-3'       |
| <i>Alp</i>       | Alkaline Phosphatase (v3)               | NM_001429381.1 | Forward   | 5'-ATGGTAACGGGCCTGGCTACA-3'     |
|                  |                                         |                | Reverse   | 5'-AGTTCTGCTCATGGACGCCGT-3'     |
| <i>Bsp</i>       | Bone Sialoprotein                       | L20232.1       | Forward   | 5'-AACGGGTTTCAGCAGACAACC-3'     |
|                  |                                         |                | Reverse   | 5'-TAAGCTCGGTAAGTGTCGCCA-3'     |
| <i>Bglap/Ocn</i> | Osteocalcin                             | NM_007541.3    | Forward   | 5'-CTCTCTCTGCTCACTCTGCT-3'      |
|                  |                                         |                | Reverse   | 5'-TTTGTAGGCGGTCTTCAAGC-3'      |
| <i>Sp7</i>       | Osterix                                 | NM_001348205.1 | Forward   | 5'-TCCTCTCTGCTTGAGGAAGAAG-3'    |
|                  |                                         |                | Reverse   | 5'-GAGTCCATTGGTGCTTGAGAAG-3'    |
| <i>Vegf</i>      | Vascular Endothelial Growth Factor (v1) | NM_001025257.3 | Forward   | 5'-ATATCAGGCTTTCTGGATTAAGGAC-3' |
|                  |                                         |                | Reverse   | 5'-ATATCAGGCTTTCTGGATTAAGGAC-3' |
| <i>Gli1</i>      | GLI-Kruppel 1                           | NM_010296.2    | Forward   | 5'-GCACCACATCAACAGTGAGC-3'      |
|                  |                                         |                | Reverse   | 5'-GCGTCTTGAGGTTTTCAAGG-3'      |
| <i>Ppia</i>      | Peptidylprolyl Isomerase A              | NM_008907.2    | Forward   | 5'-CCATGGCAAATGCTGGACCA-3'      |
|                  |                                         |                | Reverse   | 5'-TCCTGGACCCAAAACGCTCC-3'      |

Table S2. Antibody source and application.

| <u>Antibody Specificity</u> | <u>Vendor</u>     | <u>Catalog #</u> | <u>Dilution</u> | <u>Antigen Retrieval</u> |
|-----------------------------|-------------------|------------------|-----------------|--------------------------|
| PTCH1                       | Novus Biologicals | nb200-118        | 1:50            | UniTrieve Biological     |
| HIF-1 $\alpha$              | Novus Biologicals | nb100-134        | 1:50            | UniTrieve Biological     |
